# Supplementary material for: Ultrasmall Superparamagnetic Iron Oxide Labeled Silk Fibroin/Hydroxyapatite Multifunctional Scaffold Loaded With Bone Marrow-Derived Mesenchymal Stem Cells for Bone Regeneration
Source: PubMed Central journal article supplement (PMC7338306; doi:10.3389/fbioe.2020.00697), 2020-06-30
Supplement: Data_Sheet_1.pdf [file Data_Sheet_1.pdf]

## Supplementary Material

### 1 Supplementary Data

#### 1.1 Preparation of HA

Nano-scaled HA was synthesized by procedures reported previously (Motskin et al., 2009), with slight modifications. Briefly, 0.3M  $(\text{NH}_4)_2\text{HPO}_4$  solution was added into 0.5M  $\text{CaCl}_2$  solution with controlled speed (12.5 ml/min). This mixture was magnetic stirred for 2 hours at 60°C, followed by adjusting pH to 10 with ammonium hydroxide. After placed at room temperature for 24 hours, the solution was centrifuged at 5000 rpm/min. Then the resulting precipitate was washed with deionized water for 5 times and freeze-dried for 24 hours to generate HA powder.

#### 1.2 Preparation of SF

Briefly, bombyx mori silk cocoons were cut into pieces and boiled for 1 hour with 0.02M  $\text{Na}_2\text{CO}_3$  added. Then the silk fibroins were washed for several times to remove the sericins. After the degummed silk fibroins were dried at 50°C for 24 hours, they were dissolved in 9.3M LiBr for 4 hours at 60°C and dialyzed against distilled water to remove LiBr by using dialysis cassettes (Mw=8-14kDa) for 3 days. The final concentration of the silk fibroin solution was 6% (w/v).

#### 1.3 Preparation of USPIO

Briefly, 1.78g  $\text{FeCl}_2$  and 1.5g polyethylene glycol were each dissolved by 15 ml deionized water. Then they were blended to get a uniform suspension, followed by addition of 17 ml ammonium hydroxide, 5 ml 3% hydrogen peroxide and 50 ml deionized water. The reaction pH was kept to 11 by using ammonium hydroxide. The mixture was heated at 60°C for an hour and purified with distilled water. Finally, we obtained USPIO nanoparticles by an external magnetic field.

#### 1.4 Isolation of BMSCs

Four-week-old SD rats were sacrificed with bilateral tibias and femurs harvested under aseptic circumstances. Osteoepiphysis of all bones were removed, and bone marrow was flushed out through a 19-gage needle to obtain single cell suspension. After centrifugation, cells were cultured in  $\alpha$ -MEM medium supplemented with 10% (v/v) fetal bovine serum, 1% (v/v) penicillin and streptomycin. The primary BMSCs were cultured in a humidified atmosphere with 5%  $\text{CO}_2$  at 37°C and the medium was changed every 2 days. The cells were passaged after digestion with 0.25% trypsin (Gibco, USA) till they reached 80% confluence. BMSCs cultured to the third passages were used in this study.

### 2 Supplementary Figures and Tables

#### 2.1 Supplementary Tables

Table 1 Primers for qRT-PCR.

---

| Genes | Forward primer (5'→3') | Reverse primer (5'→3') |
|-------|------------------------|------------------------|
|-------|------------------------|------------------------|

---

|            |                      |                      |
|------------|----------------------|----------------------|
| Alp        | TGCAGGATCGGAACGTCAAT | GAGTTGGTAAGGCAGGGTCC |
| Bmp-2      | CACGAGAATGGACGTGCCC  | GCTTCAGGCCAAACATGCTG |
| Collagen I | AAGGCTCCCCTGGAAGAGA  | CAGGATCGGAACCTTCGCTT |
| Runx       | CCAGTTCTGCTCCTCTCCAG | GCCCACAGATTCTCTTCTG  |
| GAPDH      | AGTGCCAGCCTCGTCTCATA | GATGGTGATGGGTTTCCCGT |

**Table 2** Pore sizes and porosities of SF and SF-based scaffolds.

|                   | Pore diameter ( $\mu\text{m}$ ) $\pm$ SD | Porosity(%) $\pm$ SD |
|-------------------|------------------------------------------|----------------------|
| SF/HA             | 115.3 $\pm$ 1.5                          | 91.7 $\pm$ 3.7       |
| USPIO(0.25)/SF/HA | 118.6 $\pm$ 2.5                          | 90.6 $\pm$ 2.6       |
| USPIO(0.5)/SF/HA  | 120 $\pm$ 2.6                            | 92.4 $\pm$ 4.1       |
| USPIO(0.75)/SF/HA | 116 $\pm$ 4.2                            | 93.4 $\pm$ 2.5       |
| USPIO(1.0)/SF/HA  | 123.2 $\pm$ 2.9                          | 91.4 $\pm$ 3.6       |
| USPIO(1.5)/SF/HA  | 117.3 $\pm$ 3.3                          | 89.8 $\pm$ 1.9       |

## REFERENCES

Motskin M, Wright DM, Muller K, et al. (2009). Hydroxyapatite nano and microparticles: correlation of particle properties with cytotoxicity and biostability. *Biomaterials*. 30,3307 - 3317.  
doi:10.1016/j.biomaterials.2009.02.044
